# Supplementary material
Source: publisher figshare collection journal article supplement (https://acs.figshare.com/ndownloader/files/4156981)

# Supporting Information

## Ultra-thin SnS<sub>2</sub> Nanoparticles on Graphene Nanosheets: Synthesis, Characterization and Li-ion Storage Applications

Marappan Sathish\*, Satoshi Mitani, Takaaki Tomai and Itaru Honma\*

Institute of Multidisciplinary Research for Advanced Materials, Tohoku University,  
2-1-1, Katahira, Sendai 980-8577, Japan

E-mail: [marappan.sathish@gmail.com](mailto:marappan.sathish@gmail.com); [i.honma@tagen.tohoku.ac.jp](mailto:i.honma@tagen.tohoku.ac.jp)

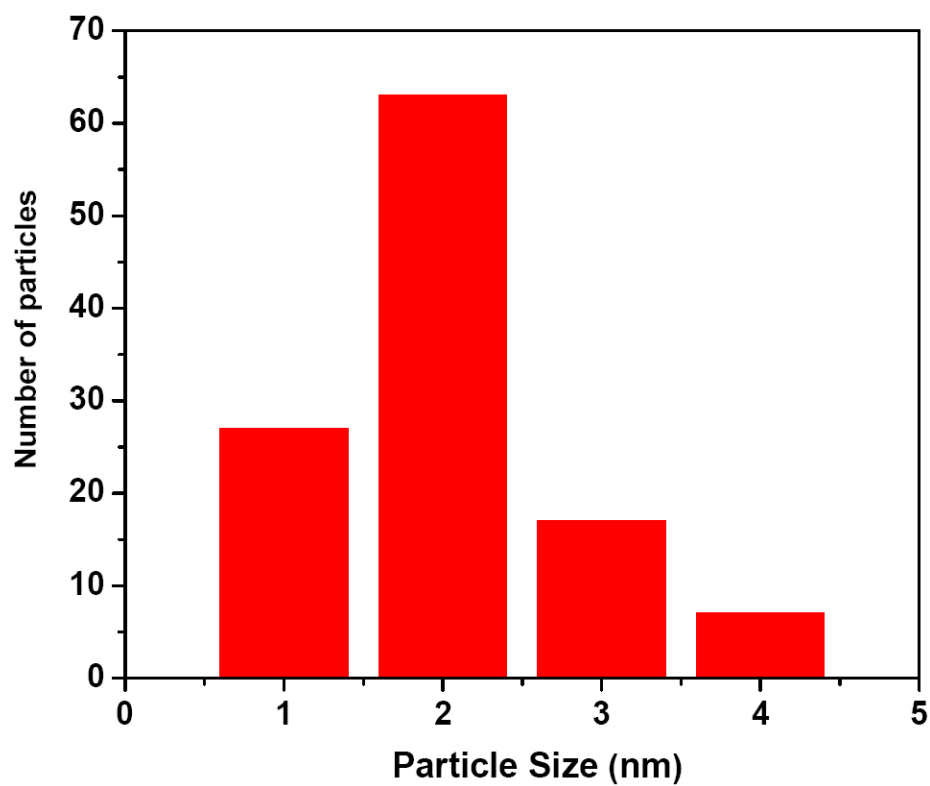

**Figure S1.** Particle size distribution profile of SnS<sub>2</sub> nanoparticles decorated on the graphene surface in SnS<sub>2</sub>/GNS nanocomposite (calculated from HR-TEM images).

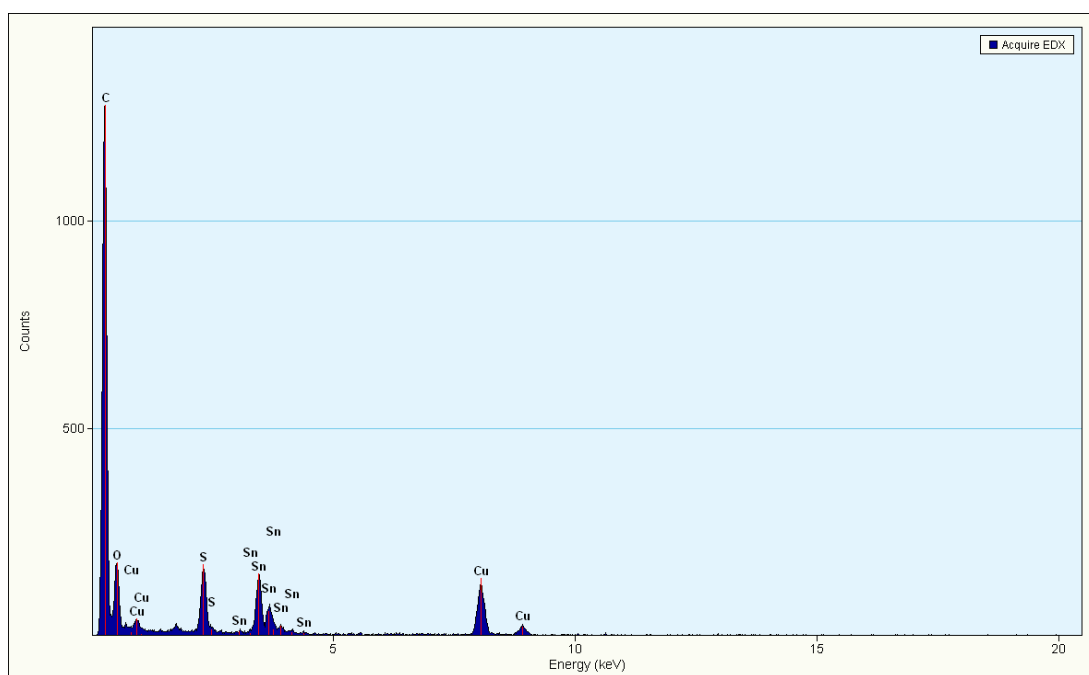

**Figure S2.** TEM-EDX profile of SnS<sub>2</sub>/GNS nanocomposite on Cu grid indicates the presence of Sn, S and C in the SnS<sub>2</sub>/GNS nanocomposite.

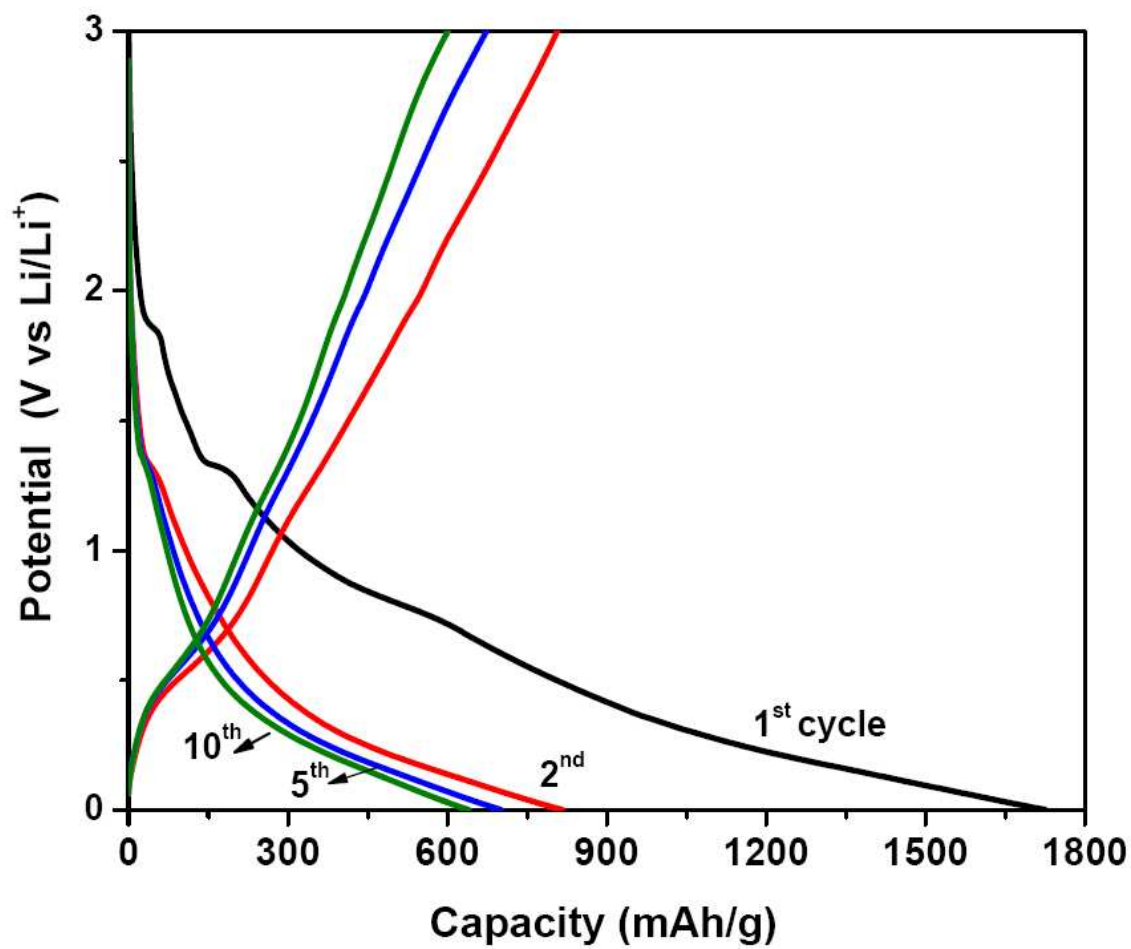

**Figure S3.** Li-ion charge-discharge profile of SnS<sub>2</sub>/GNS nanocomposite at current density of 0.1C.

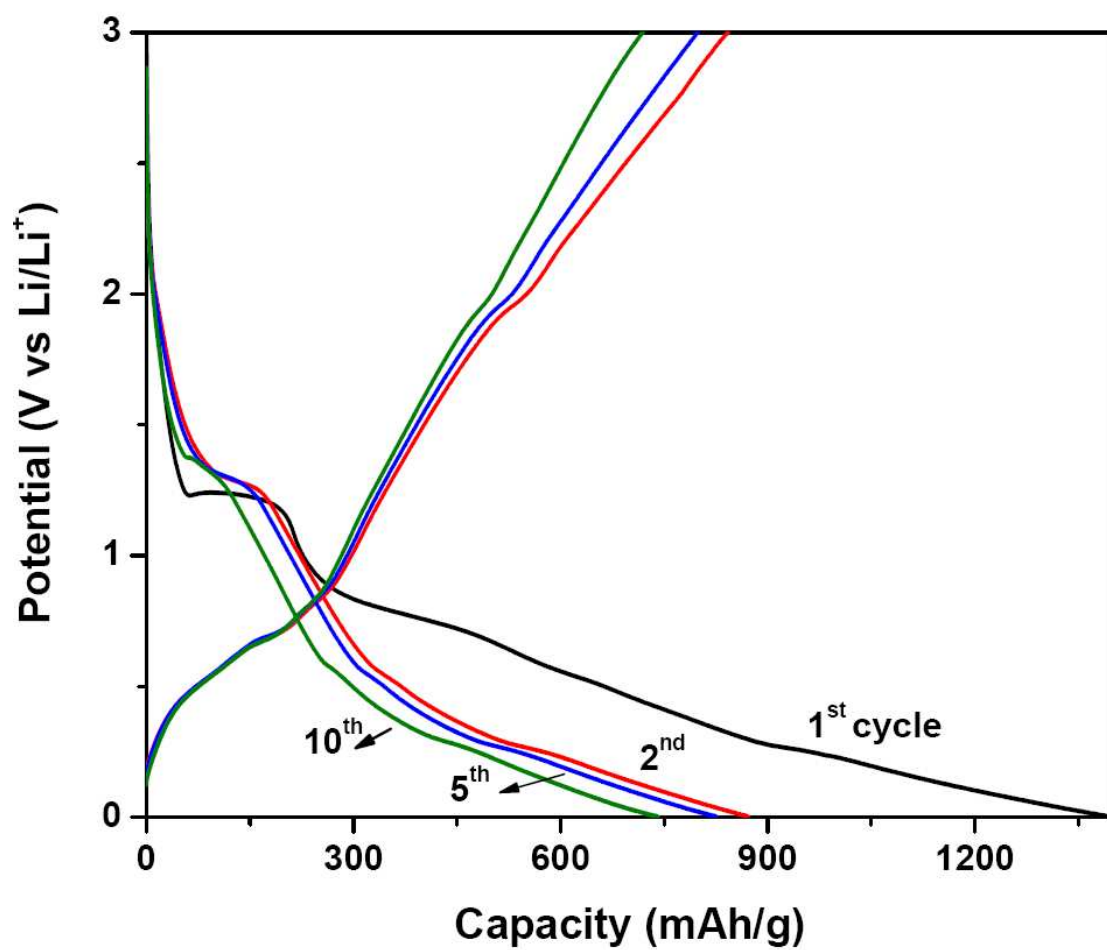

**Figure S4.** Li-ion charge-discharge profile of SnS<sub>2</sub>/GNS-RG nanocomposite at current density of 0.1C

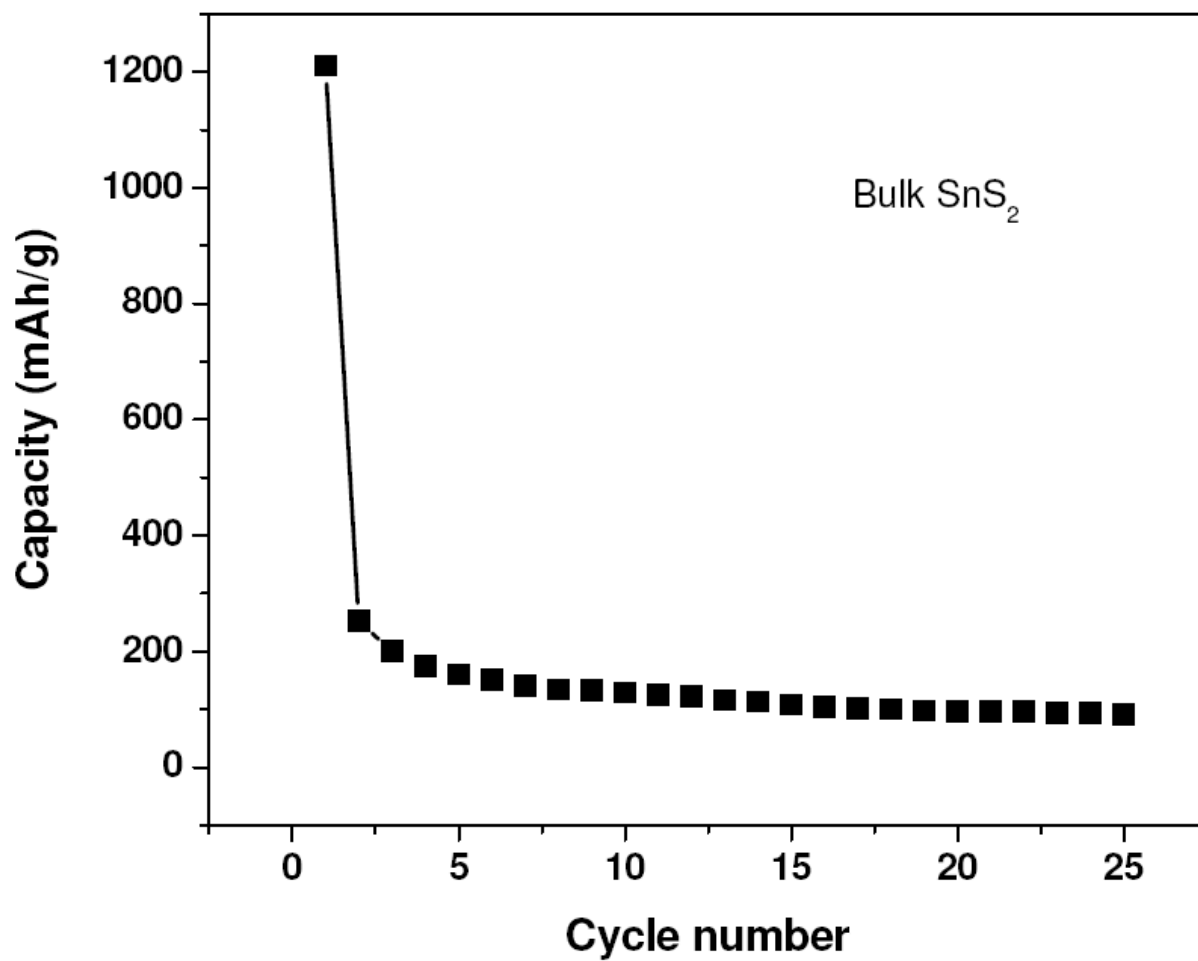

**Figure S5.** Capacity profile (up to 25 cycles) of GNS free bulk SnS<sub>2</sub> electrodes at current density of 0.1C

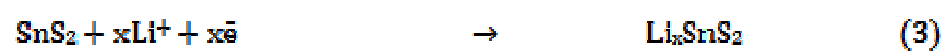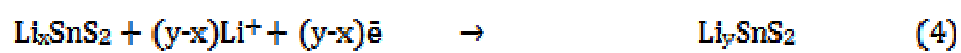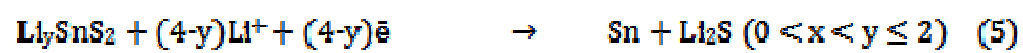

Supplement: Supplementary file 1 [file 4156981]
